# Supplementary material
Source: publisher figshare collection journal article supplement (https://geolsoc.figshare.com/ndownloader/files/12729011)
Supplement: Supplementary file 1 [file 12729011]

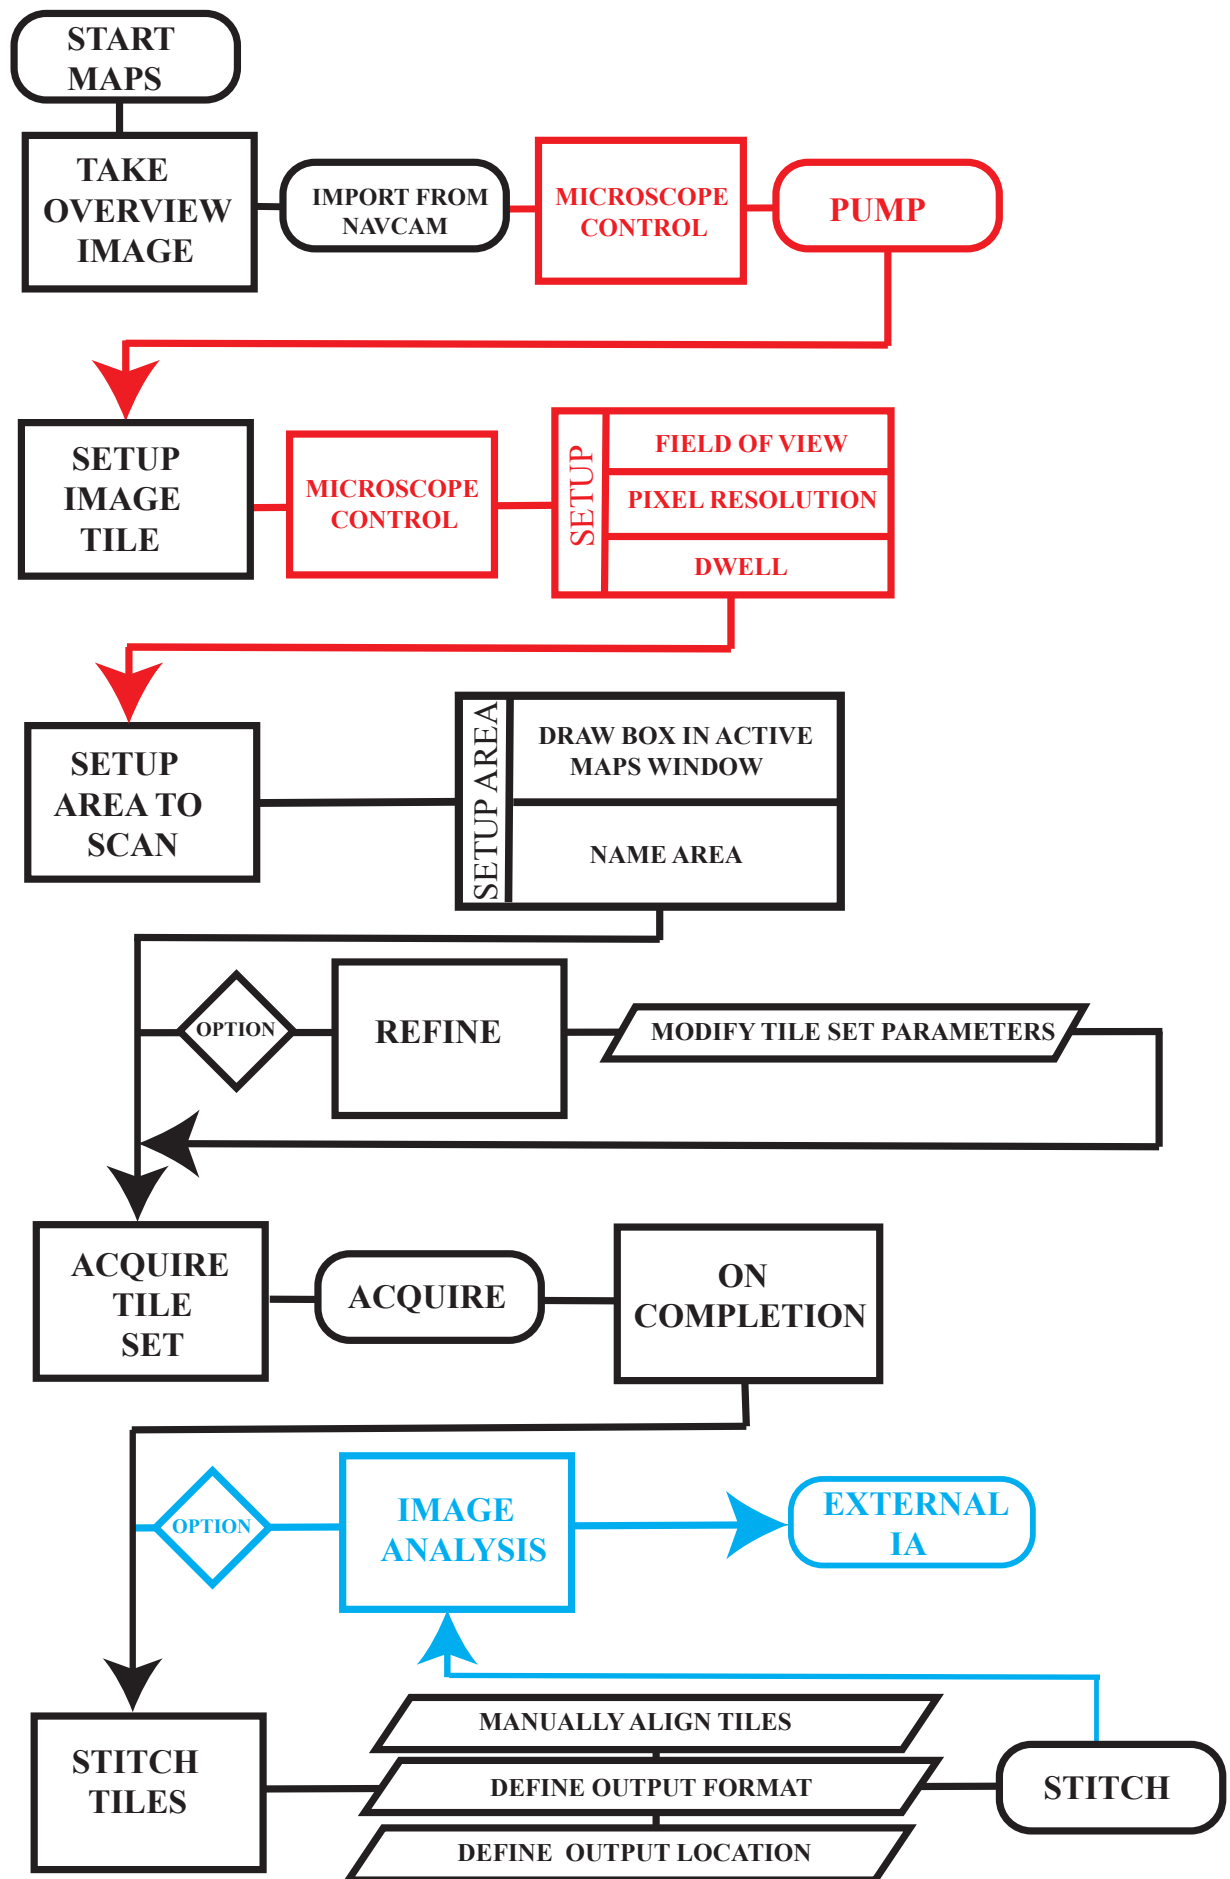

**Fig. S1.** Flow chart of typical workflow for the acquisition of Maps montages (FEI). Red represents operations from within the microscope control software, black from within Maps and blue output for external manipulation. Basic acquisition illustrated, additional options not shown.
